# Supplementary material
Source: ML conference proceedings conference paper supplement (https://openreview.net/forum?id=Q4ooLNOFeR)

# All SAEs — base vs. after selection

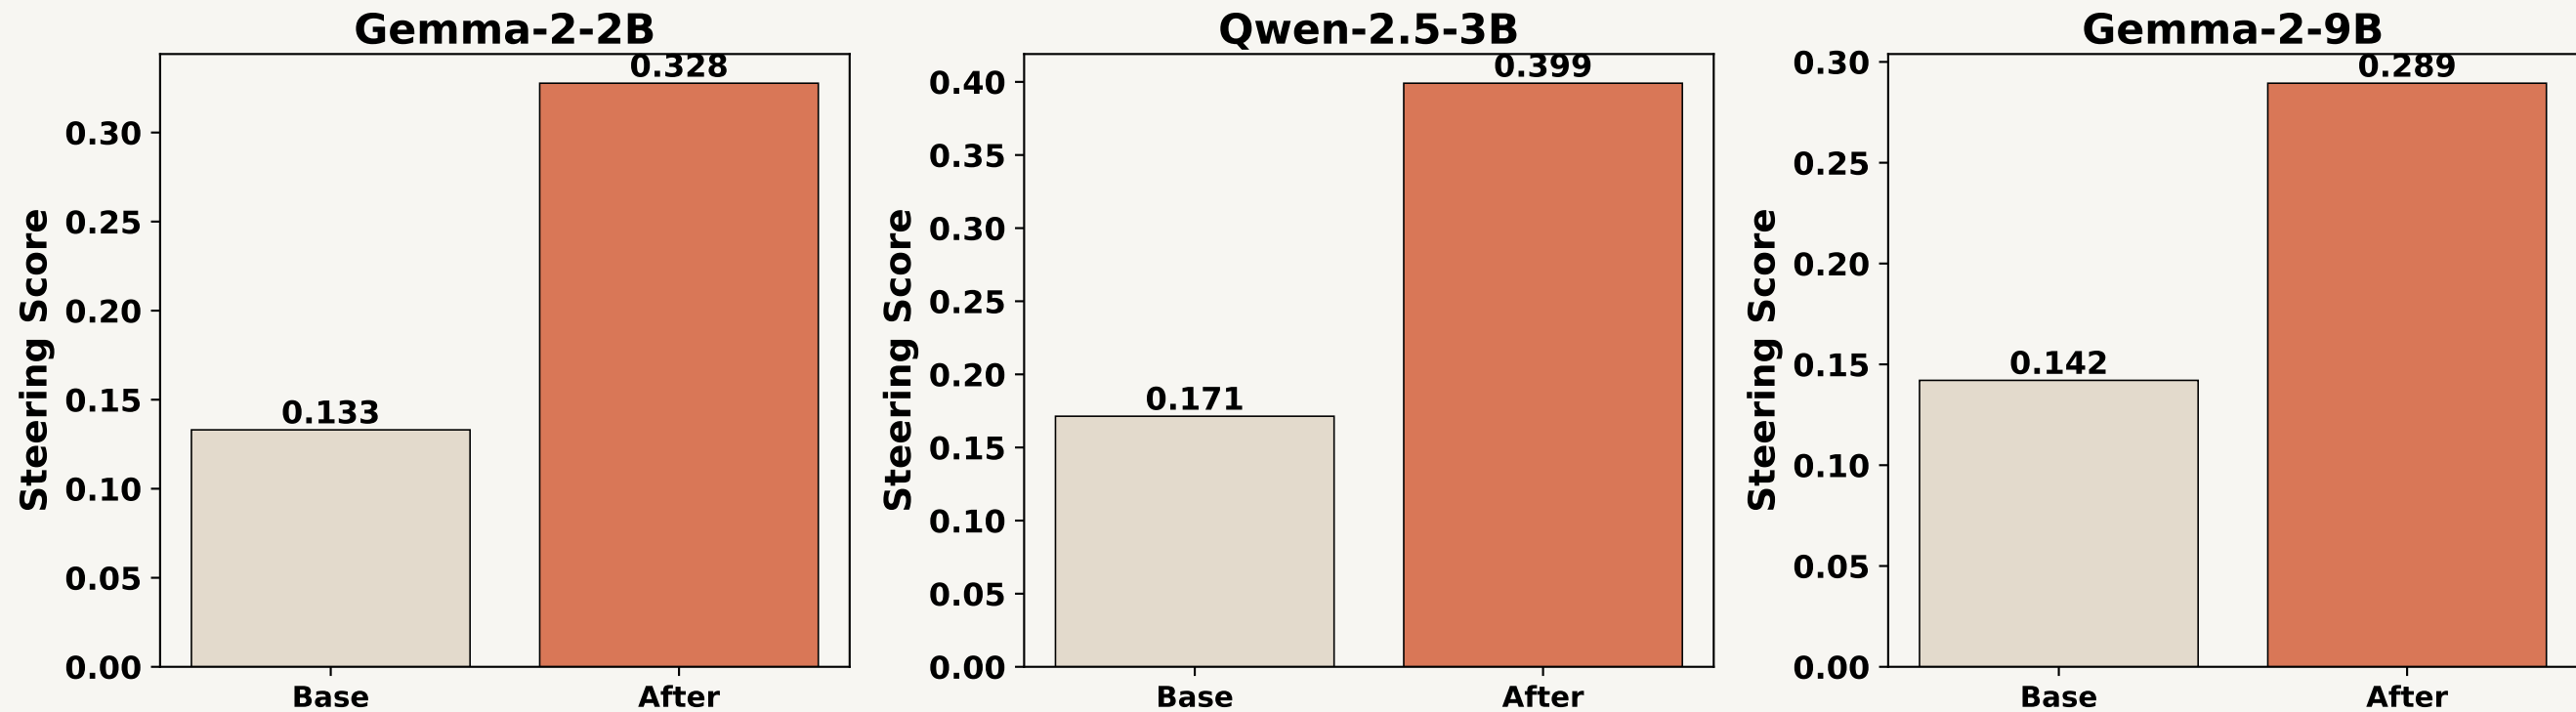

Supplement: supplementary_material [file fig2_overall_baseline_vs_after_combined.pdf › SAE4Steer-main/saes-are-good-for-steering/src/exp_results/fig2_overall_baseline_vs_after_combined.pdf]

# Lift distribution by architecture

## Gemma-2-2B

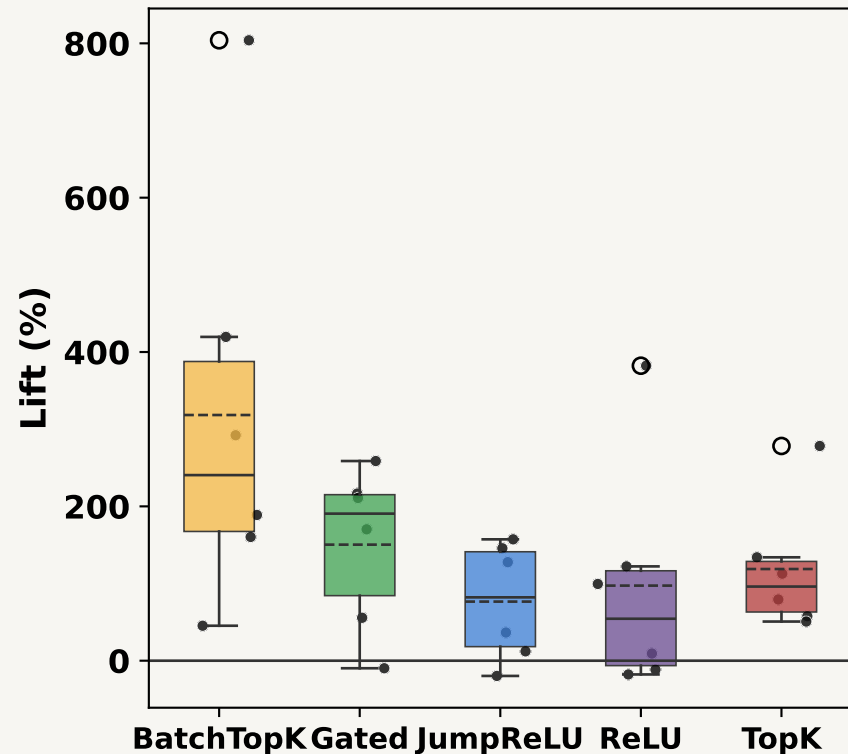

## Qwen-2.5-3B

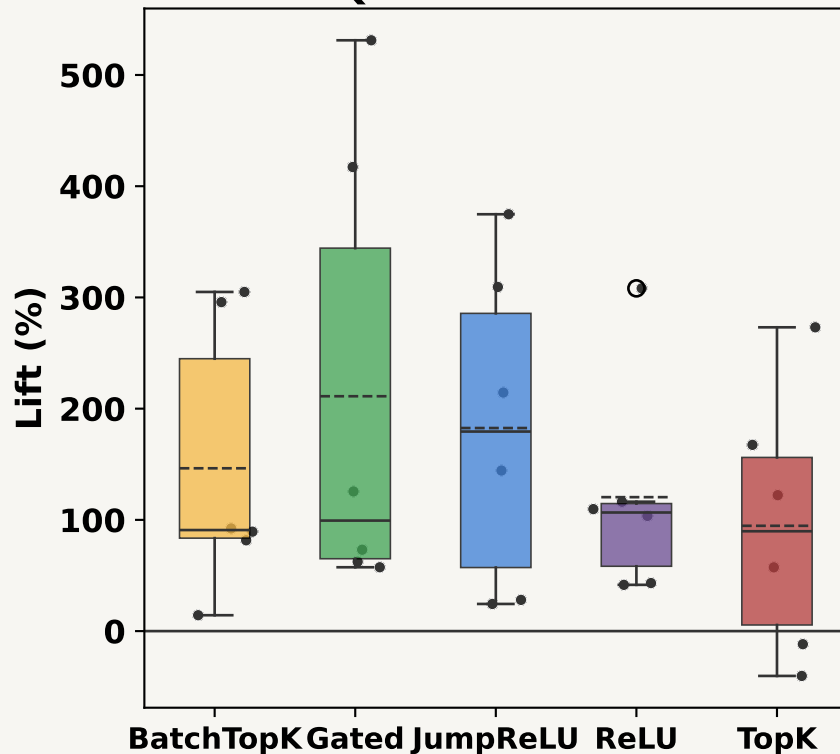

## Gemma-2-9B

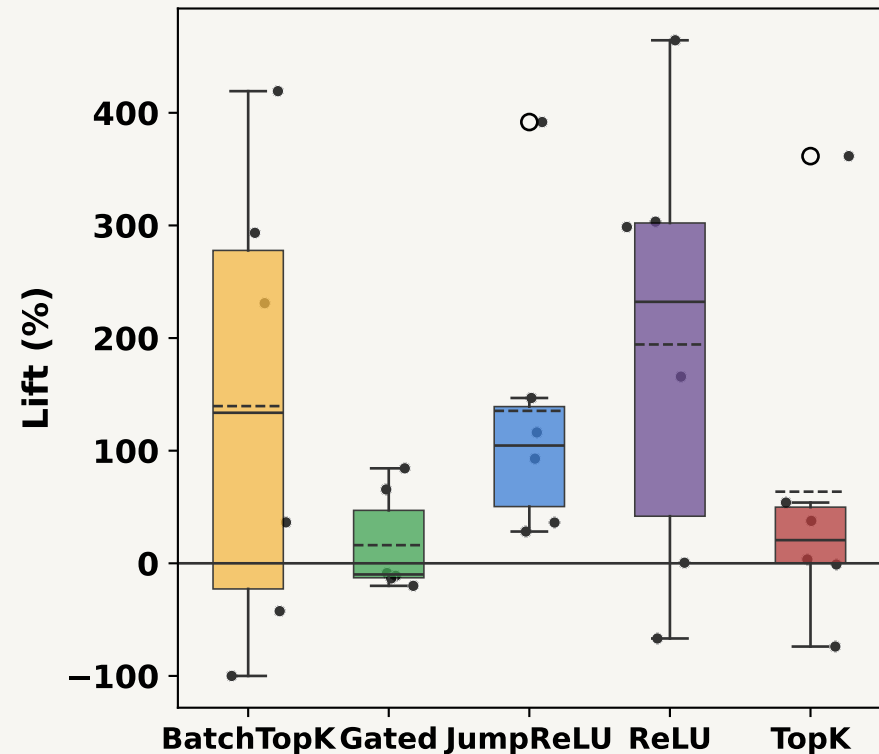

Supplement: supplementary_material [file fig3_arch_lift_distribution_combined.pdf › SAE4Steer-main/saes-are-good-for-steering/src/exp_results/fig3_arch_lift_distribution_combined.pdf]
